# Supplementary material for: One-step synthesis of graphitic carbon-nitride doped with black-red phosphorus as a novel, efficient and free-metal bifunctional catalyst and its application for electrochemical overall water splitting
Source: Royal Society of Chemistry journal article supplement (doi:10.1039/d1se00317h), 2021-01-01
Supplement: d1se00317h1.pdf [file d1se00317h1.pdf]

## Supporting Information

### **One-Step Synthesis of Graphitic Carbon-Nitride doped with Black-Red Phosphorus as a Novel, Efficient and Free-Metal Bifunctional Catalyst and its Application for Electrochemical Overall Water Splitting**

Fatemeh Shiravani, Javad Tashkhourian\* and Behzad Haghighi\*

Department of Chemistry, Faculty of Sciences, Shiraz University, Shiraz 71454, Iran

---

\* Corresponding authors:

Tel: +98 71 3613 7141, Fax: +98 71 3646 0788

*E-mail address:* [tashkhourian@shirazu.ac.ir](mailto:tashkhourian@shirazu.ac.ir) (J. Tashkhourian, Orcid ID: 0000-0003-3437-0782)

Tel: +98 71 3613 7178, Fax: +98 71 3646 0788

*E-mail address:* [bhaghighi@shirazu.ac.ir](mailto:bhaghighi@shirazu.ac.ir) (B. Haghighi, Orcid ID: 0000-0003-0974-7912)

---

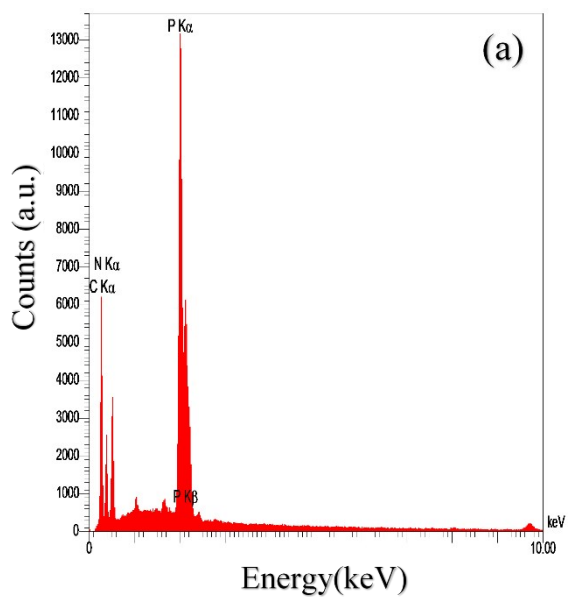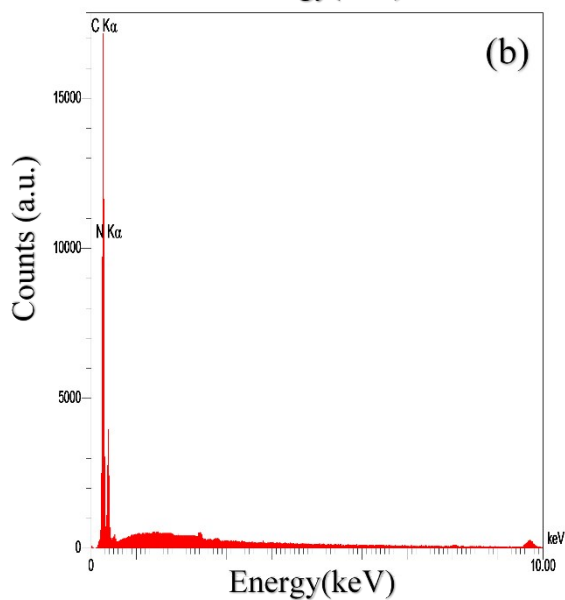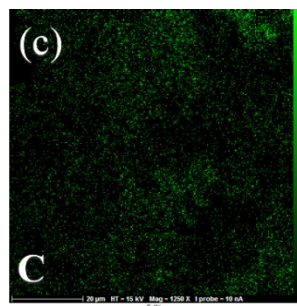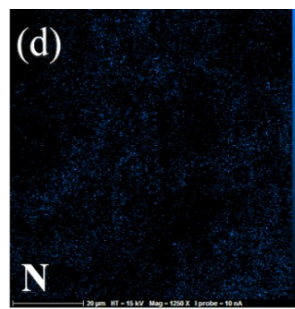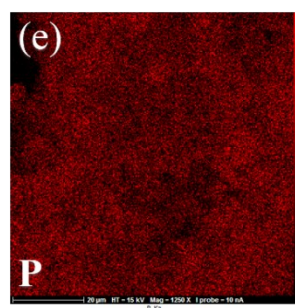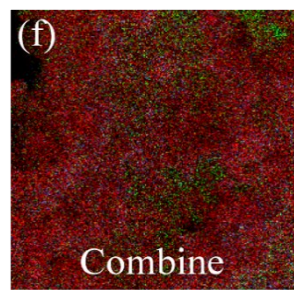

**Figure S1** EDS analysis for (a) BRP-g-C<sub>3</sub>N<sub>4</sub> and (b) g-C<sub>3</sub>N<sub>4</sub>, (c-f). Elemental mapping of (c) C, (d) N, (e) P, and (f) C, N and P altogether elements in BRP-g-C<sub>3</sub>N<sub>4</sub> composite

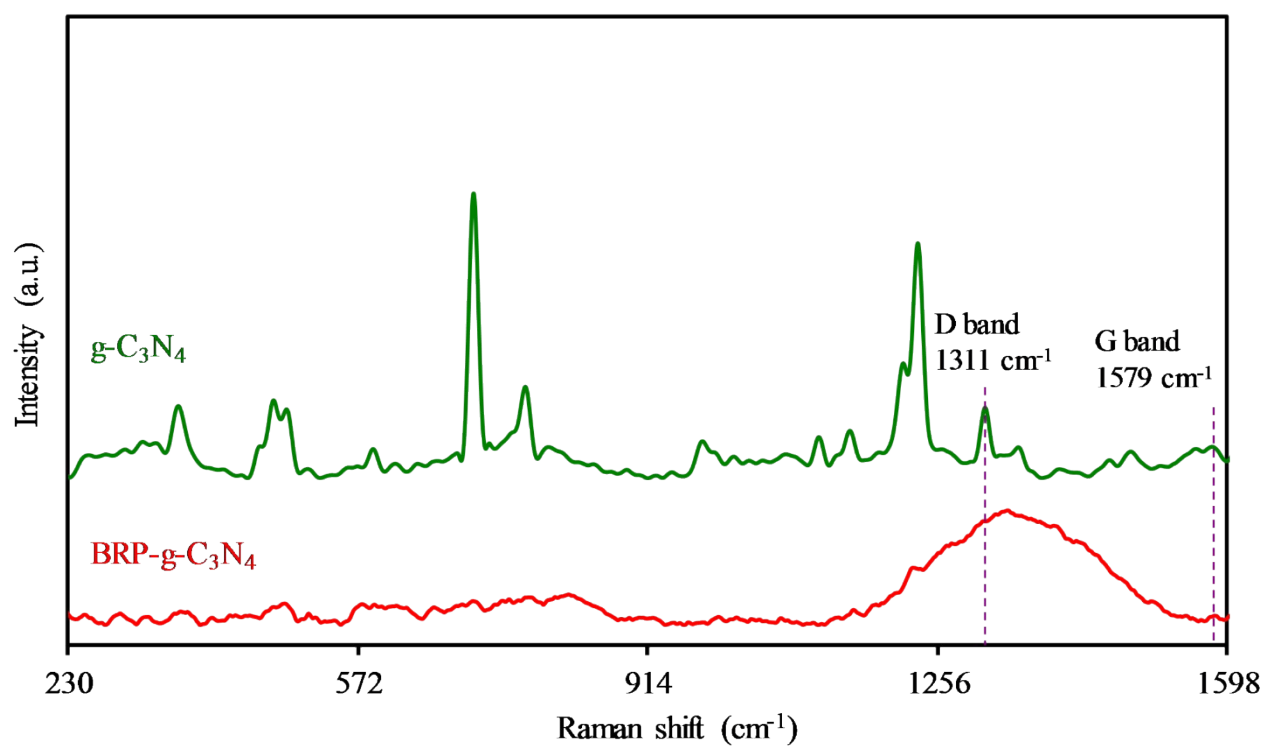

**Figure S2** Raman spectra and  $I_D/I_G$  ratio for  $g\text{-C}_3\text{N}_4$ , and  $\text{BRP-g-C}_3\text{N}_4$  composite

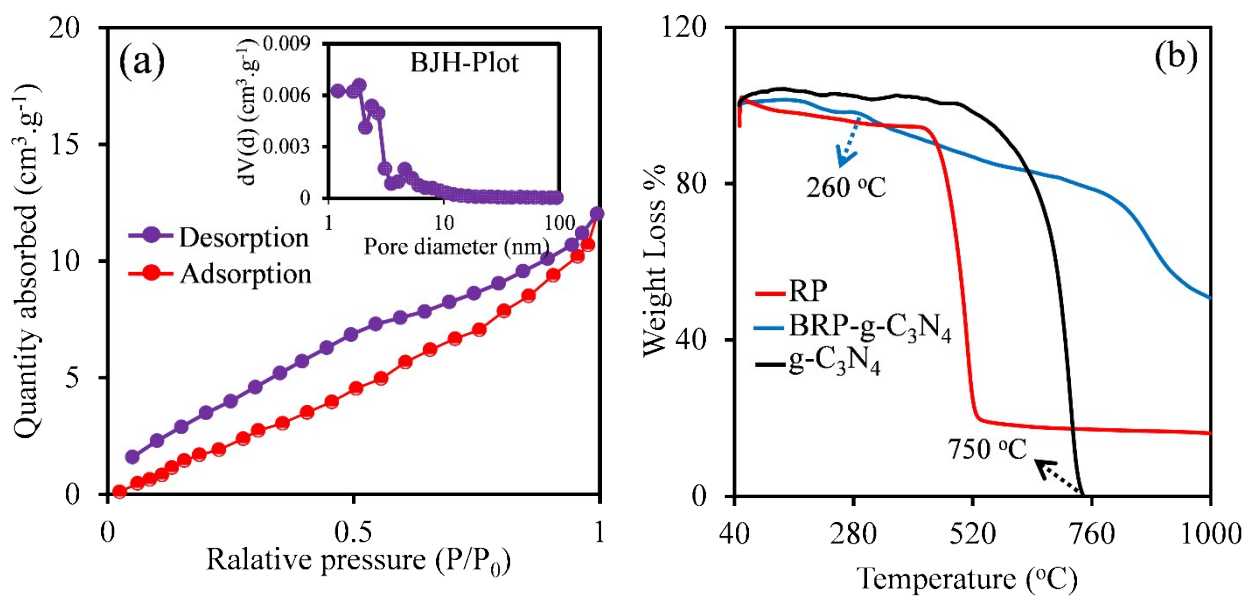

**Figure S3** (a)  $N_2$  adsorption–desorption isotherm and (the insert) corresponding pore size distribution of BRP- $g-C_3N_4$  composite, and (b) TGA curves of RP, BRP- $g-C_3N_4$ , and  $g-C_3N_4$

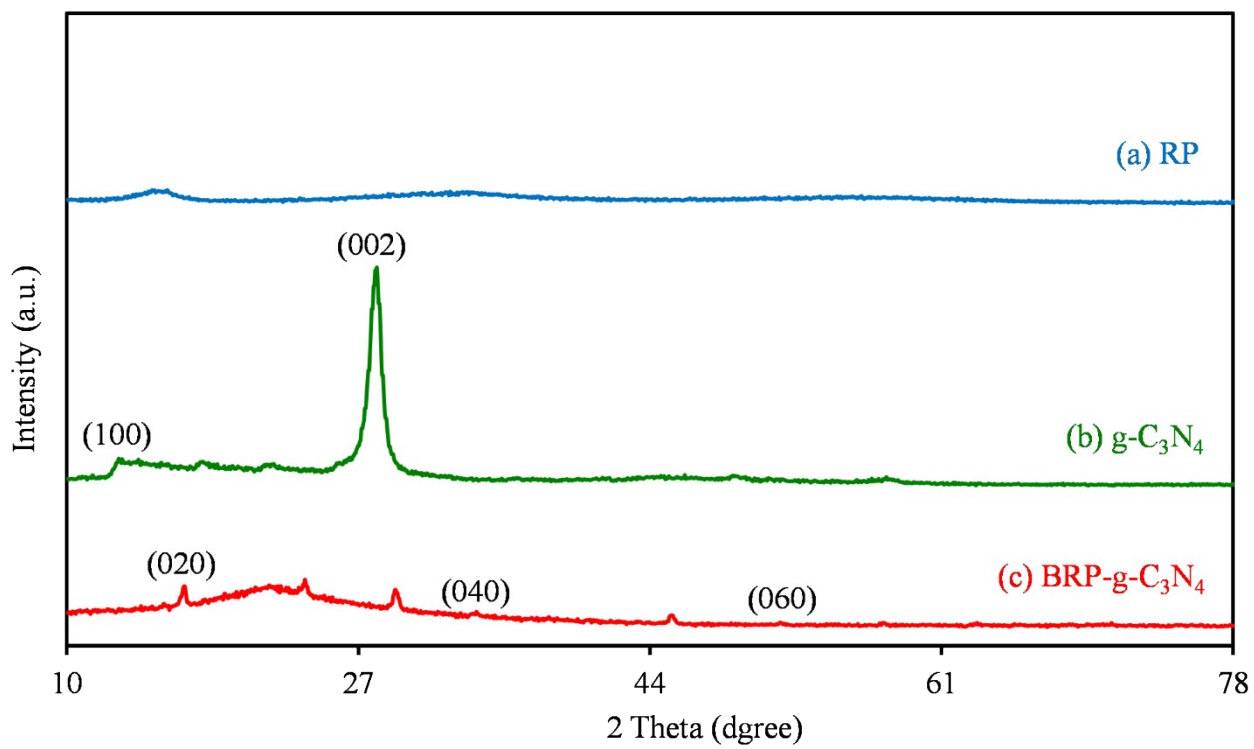

**Figure S4** XRD spectra of the (a) RP, (b) g-C<sub>3</sub>N<sub>4</sub>, and (c) BRP-g-C<sub>3</sub>N<sub>4</sub>

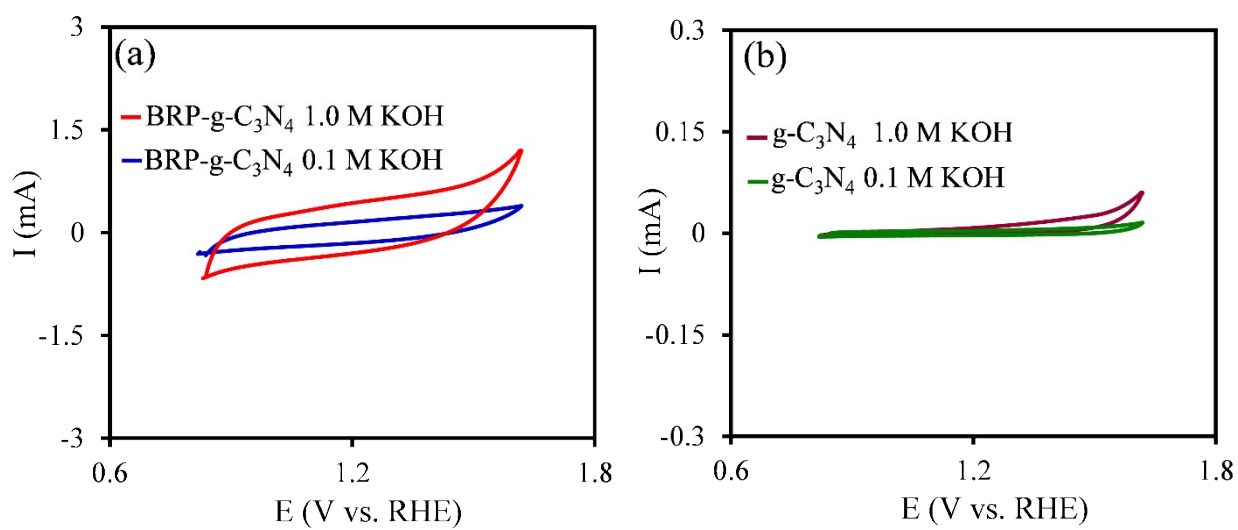

**Figure S5** Cyclic voltammograms of (a) BRP-g-C<sub>3</sub>N<sub>4</sub>, and (b) g-C<sub>3</sub>N<sub>4</sub> modified CPE at scan rate  $10 \text{ mV}\cdot\text{s}^{-1}$  in 1.0 and 0.1 M KOH.

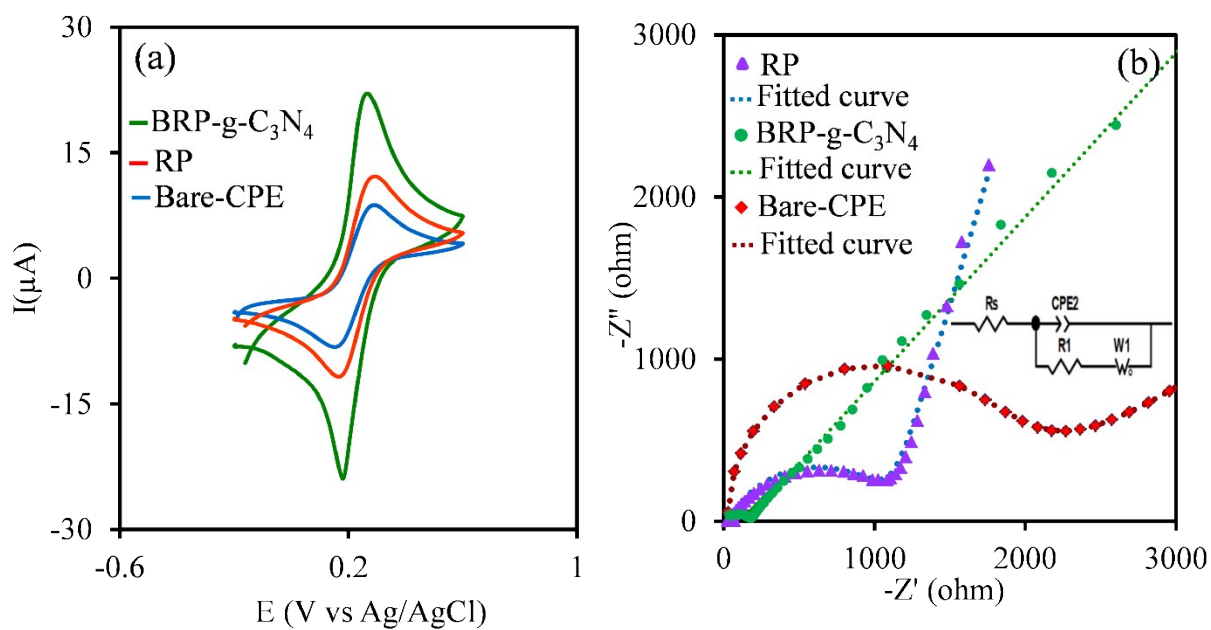

**Figure S6** (a) Cyclic voltammograms and (b) electrochemical impedance spectra recorded for BRP-g C<sub>3</sub>N<sub>4</sub>, RP modified and bare-CPE in 0.1 M KCl containing 5.0 mM [Fe(CN)<sub>6</sub>]<sup>-3/4</sup>. Scan rate for CV studies; 10 mV s<sup>-1</sup>. Inset: Equivalent circuit

**Table S1:**

| Electrodes                               | R <sub>ch</sub> (ohm) | R <sub>s</sub> (ohm) | CPE-T     | Chi-Squared |
|------------------------------------------|-----------------------|----------------------|-----------|-------------|
| Bare-CPE                                 | 1827                  | 32.39                | 3.0098E-7 | 3.8E-6      |
| RP-CPE                                   | 1141                  | 29.58                | 4.1E-5    | 4.0E-4      |
| BRP-g-C <sub>3</sub> N <sub>4</sub> -CPE | 112                   | 42.6                 | 2.08E-7   | 1.08E-4     |

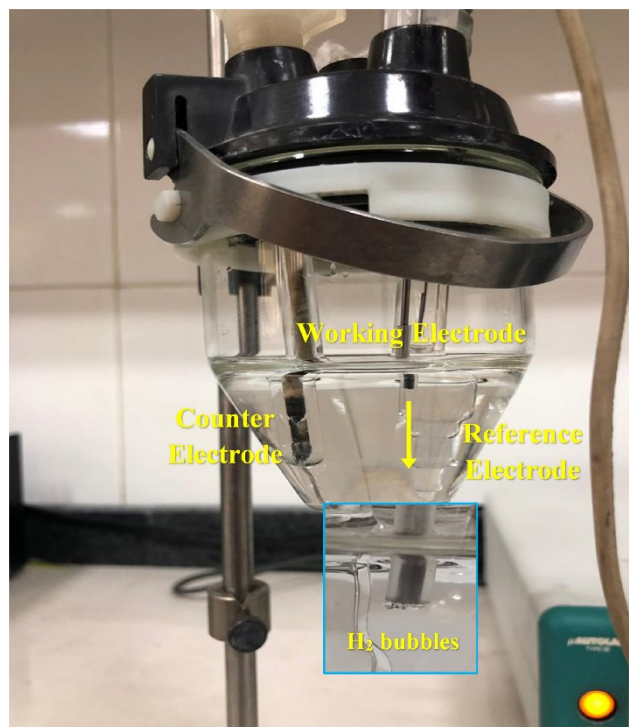

**Figure S7** Experimental setup and (the insert) hydrogen bubbles on BRP-g-C<sub>3</sub>N<sub>4</sub>-CPE.



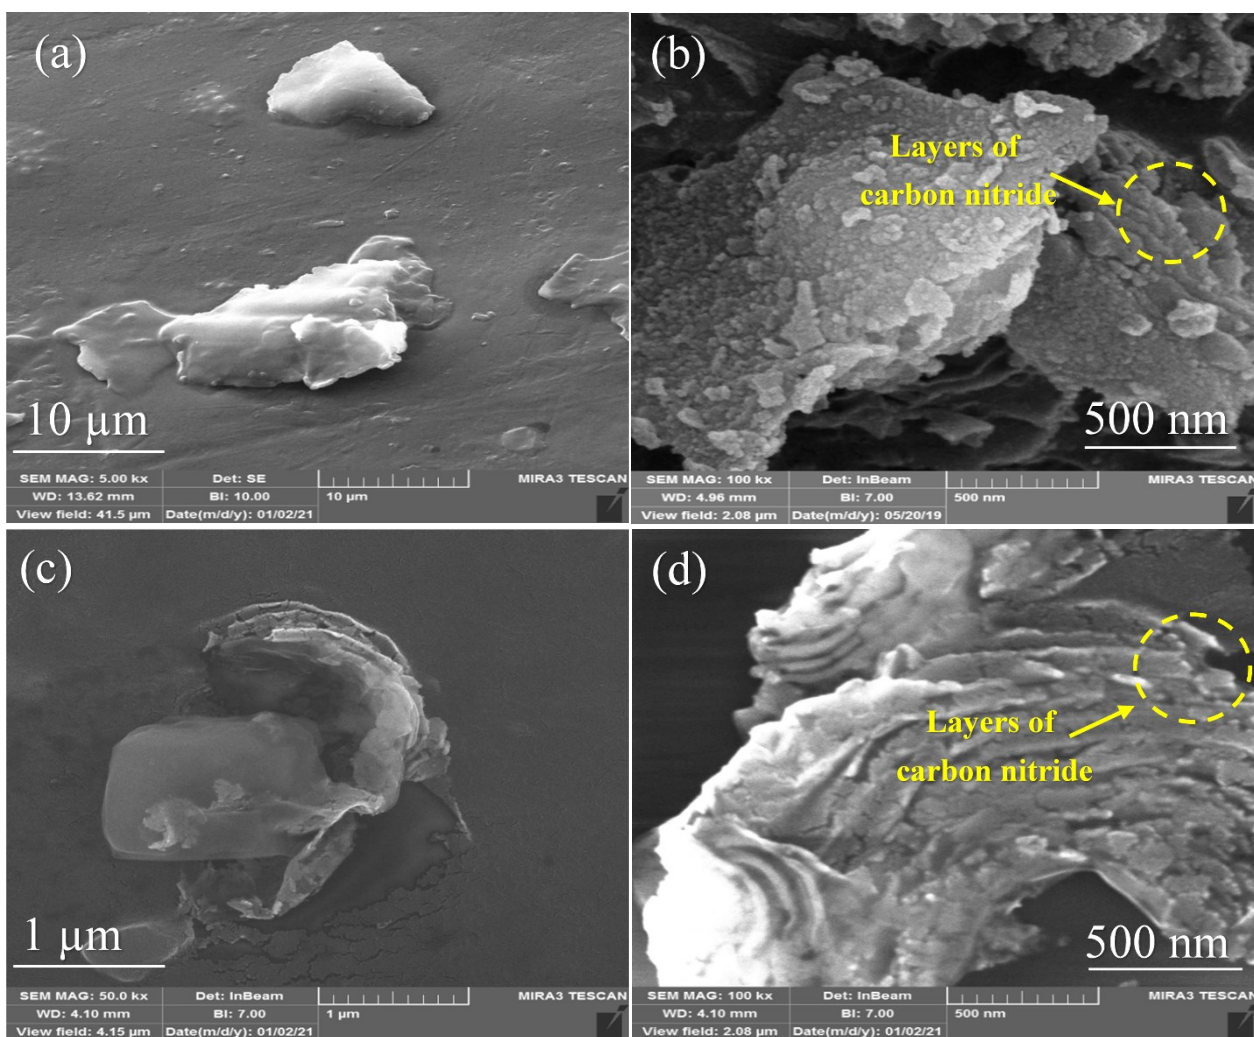

**Figure S8** FE-SEM images of BRP-g-C<sub>3</sub>N<sub>4</sub>-CPE (a,b) before ,and (c,d) after chronoamperometry

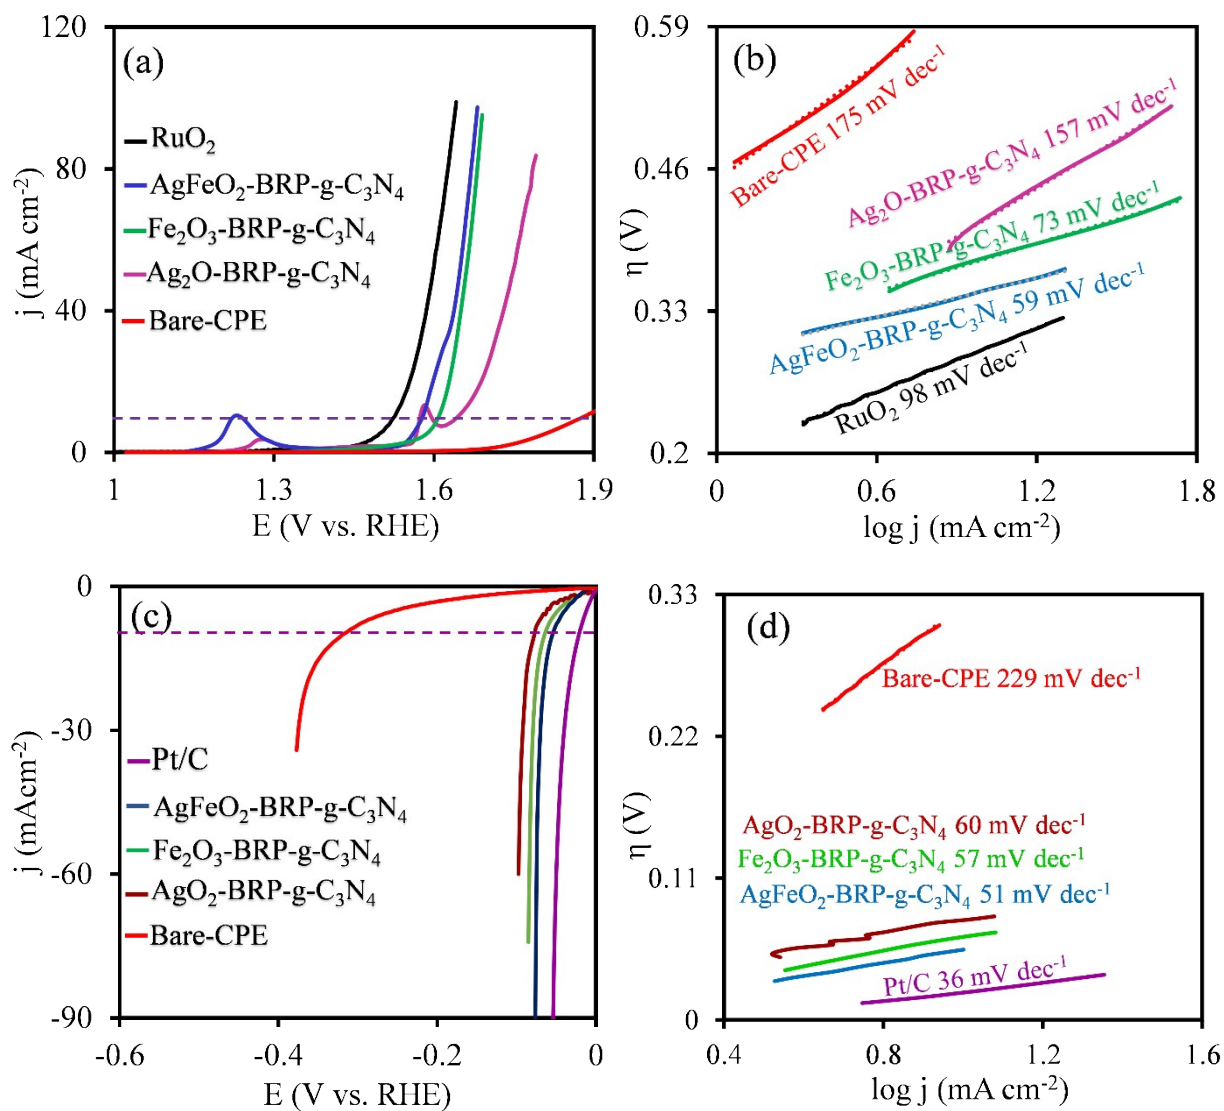

**Figure S9** (a) OER polarization curves, (b) corresponding OER Tafel plots, (c) HER polarization curves and (d) corresponding HER Tafel plots for AgFeO<sub>2</sub>-BRP-g-C<sub>3</sub>N<sub>4</sub>, Fe<sub>2</sub>O<sub>3</sub>-BRP-g-C<sub>3</sub>N<sub>4</sub>, Ag<sub>2</sub>O-BRP-g-C<sub>3</sub>N modified CPE and bare, RuO<sub>2</sub> and Pt/C CPE in 1.0 M KOH with a scan rate of 5.0 mV s<sup>-1</sup>.
